# Supplementary material for: Galacto-oligosaccharides regulate intestinal mucosal sialylation to counteract antibiotic-induced mucin dysbiosis
Source: Royal Society of Chemistry journal article supplement (doi:10.1039/d4fo04626a), 2024-01-01
Supplement: d4fo04626a8.pdf [file d4fo04626a8.pdf]

Supplementary Table S1 The sialyltransferase family

| Sialyltransferase | Substrate | Structures formed                                                   | References                     |
|-------------------|-----------|---------------------------------------------------------------------|--------------------------------|
| ST3s              |           |                                                                     |                                |
| ST3Gal1           | O-GP      | Neu5Ac $\alpha$ 2-3Gal $\beta$ 1-3GalNAc-                           | (Burchell et al 1999)          |
| ST3Gal2           | O-GP      | Neu5Ac $\alpha$ 2-3Gal $\beta$ 1-3GalNAc-                           | (Margetts et al 2008)          |
| ST3Gal3           | O-GP      | Neu5Ac $\alpha$ 2-3Gal $\beta$ 1-3/4GlcNAc-                         | (Kitagawa and Paulson 1993)    |
| ST3Gal4           | O-GP      | Neu5Ac $\alpha$ 2-3Gal $\beta$ 1-4GlcNAc-                           | (Carvalho et al 2010)          |
| ST3Gal6           | O-GP      | Neu5Ac $\alpha$ 2-3Gal $\beta$ 1-4GlcNAc-                           | (Kawamura et al 2008)          |
| ST6s              |           |                                                                     |                                |
| ST6Gal1           | N-GP      | Neu5Ac $\alpha$ 2-6Gal $\beta$ 1-4GlcNAc $\beta$ -                  | (Grundmann et al 1990)         |
| ST6Gal2           | N-GP      | Neu5Ac $\alpha$ 2-6Gal(NAc) $\beta$ 1-4GlcNAc-                      | (Krzewinski-Recchi et al 2003) |
| ST6GalNAcs        |           |                                                                     |                                |
| ST6GalNAc1        | O-GP      | Neu5Ac $\alpha$ 2-6-GalNAc-Ser                                      | (Yao et al 2022)               |
| ST6GalNAc2        | O-GP      | Gal $\beta$ 1-3-GalNAc-Ser<br>Neu5Ac $\alpha$ 2-6                   | (Samyn-Petit et al 2000)       |
| ST6GalNAc3        | O-GP      | Neu5Ac $\alpha$ 2-3Gal $\beta$ 1-3GalNAc-Ser<br>Neu5Ac $\alpha$ 2-6 | (Lee et al 1999)               |
| ST6GalNAc4        | O-GP      | Neu5Ac $\alpha$ 2-3Gal $\beta$ 1-3GalNAc-Ser<br>Neu5Ac $\alpha$ 2-6 | (Harduin-Lepers et al 2000)    |
| ST8s              |           |                                                                     |                                |
| ST8Sia2           | GP        | Neu5Ac $\alpha$ 2-8)nNeu5Ac $\alpha$ 2-3Gal $\beta$ 1-4GlcNAc-      | (Kojima et al 1995)            |
| ST8Sia3           | GP        | Neu5Ac $\alpha$ 2-8Neu5Ac $\alpha$ 2-6GalNAc-                       | (Lee et al 1998)               |
| ST8Sia4           | GP        | (Neu5Ac $\alpha$ 2-8)nNeu5Ac $\alpha$ 2-3Gal $\beta$ 1-4GlcNAc-     | (Nakayama et al 1995)          |
| ST8Sia6           | O-GP      | Neu5Ac $\alpha$ 2-8Neu5Ac $\alpha$ 2-3Gal $\beta$ 1-3GalNAc         | (Takashima et al 2002)         |

## References

- Burchell J, Poulson R, Hanby A, Whitehouse C, Cooper L, Clausen H *et al* (1999). An alpha2,3 sialyltransferase (ST3Gal I) is elevated in primary breast carcinomas. *Glycobiology* **9**: 1307-1311.
- Carvalho AS, Harduin-Lepers A, Magalhães A, Machado E, Mendes N, Costa LT *et al* (2010). Differential expression of alpha-2,3-sialyltransferases and alpha-1,3/4-fucosyltransferases regulates the levels of sialyl Lewis a and sialyl Lewis x in gastrointestinal carcinoma cells. *The international journal of biochemistry & cell biology* **42**: 80-89.
- Grundmann U, Nerlich C, Rein T, Zettlmeissl G (1990). Complete cDNA sequence encoding human beta-galactoside alpha-2,6-sialyltransferase. *Nucleic acids research* **18**: 667.
- Harduin-Lepers A, Stokes DC, Steelant WF, Samyn-Petit B, Krzewinski-Recchi MA, Vallejo-Ruiz V *et al* (2000). Cloning, expression and gene organization of a human Neu5Ac alpha 2-3Gal beta 1-3GalNAc alpha 2,6-sialyltransferase: hST6GalNAcIV. *Biochem J* **352 Pt 1**: 37-48.
- Kawamura YI, Toyota M, Kawashima R, Hagiwara T, Suzuki H, Imai K *et al* (2008). DNA hypermethylation contributes to incomplete synthesis of carbohydrate determinants in gastrointestinal cancer. *Gastroenterology* **135**: 142-151.e143.
- Kitagawa H, Paulson JC (1993). Cloning and expression of human Gal beta 1,3(4)GlcNAc alpha 2,3-sialyltransferase. *Biochemical and biophysical research communications* **194**: 375-382.
- Kojima N, Yoshida Y, Tsuji S (1995). A developmentally regulated member of the sialyltransferase family (ST8Sia II, STX) is a polysialic acid synthase. *FEBS letters* **373**: 119-122.
- Krzewinski-Recchi MA, Julien S, Juliant S, Teinturier-Lelièvre M, Samyn-Petit B, Montiel MD *et al* (2003). Identification and functional expression of a second human beta-galactoside alpha2,6-sialyltransferase, ST6Gal II. *European journal of biochemistry* **270**: 950-961.
- Lee YC, Kim YJ, Lee KY, Kim KS, Kim BU, Kim HN *et al* (1998). Cloning and expression of cDNA for a human Sia alpha 2,3Gal beta 1, 4GlcNA:alpha 2,8-sialyltransferase (hST8Sia III). *Archives of biochemistry and biophysics* **360**: 41-46.
- Lee YC, Kaufmann M, Kitazume-Kawaguchi S, Kono M, Takashima S, Kurosawa N *et al* (1999). Molecular cloning and functional expression of two members of mouse NeuAcalpha2,3Galbeta1,3GalNAc GalNAcalpha2,6-sialyltransferase family, ST6GalNAc III and IV. *The Journal of biological chemistry* **274**: 11958-11967.
- Margetts CD, Morris M, Astuti D, Gentle DC, Cascon A, McRonald FE *et al* (2008). Evaluation of a functional epigenetic approach to identify promoter region methylation in pheochromocytoma and neuroblastoma. *Endocrine-related cancer* **15**: 777-786.
- Nakayama J, Fukuda MN, Fredette B, Ranscht B, Fukuda M (1995). Expression cloning of a human polysialyltransferase that forms the polysialylated neural cell adhesion molecule present in embryonic brain. *Proc Natl Acad Sci U S A* **92**: 7031-7035.
- Samyn-Petit B, Krzewinski-Recchi MA, Steelant WF, Delannoy P, Harduin-Lepers A (2000). Molecular cloning and functional expression of human ST6GalNAc II. Molecular expression in various human cultured cells. *Biochim Biophys Acta* **1474**: 201-211.
- Takashima S, Ishida HK, Inazu T, Ando T, Ishida H, Kiso M *et al* (2002). Molecular cloning and expression of a sixth type of alpha 2,8-sialyltransferase (ST8Sia VI) that sialylates O-glycans. *The Journal of biological chemistry* **277**: 24030-24038.
- Yao Y, Kim G, Shafer S, Chen Z, Kubo S, Ji Y *et al* (2022). Mucus sialylation determines intestinal host-commensal homeostasis. *Cell* **185**: 1172-1188.e1128.
