# Supplementary material for: Galacto-oligosaccharides regulate intestinal mucosal sialylation to counteract antibiotic-induced mucin dysbiosis
Source: Royal Society of Chemistry journal article supplement (doi:10.1039/d4fo04626a), 2024-01-01
Supplement: d4fo04626a9.pdf [file d4fo04626a9.pdf]

**Supplementary Table S2 Primers used for RT-qPCR in this study**

| Gene name         | Primer sequences(5'→3')                                 | Product length (bp) | Source         |
|-------------------|---------------------------------------------------------|---------------------|----------------|
| <i>GALNT1</i>     | F: ACGACAAGCGTGGTGATT<br>R: CTCGCAGTGAGCATCTAA          | 291                 | XM_039097137.1 |
| <i>GALNT2</i>     | F: TGCCAAGCAACAACAAGA<br>R: TTAGCAGCGGACATCGTG          | 783                 | NM_001106196.2 |
| <i>GALNT6</i>     | F: GCTTTAATGCCTTTGCCAGT<br>R: CCAGGCTTCGTTGTGGAATA      | 149                 | XM_039078233.1 |
| <i>GALNT7</i>     | F: CAGAGCCCACTGAGCAGGAT<br>R: TGAATCTGTCTATCTCCAGGAGCTA | 97                  | XM_006253083.3 |
| <i>GALNT12</i>    | F: CAGCTAGAGGGTGCATGTGG<br>R: GTGAGGAGTCCGAGTGGGTA      | 170                 | XM_232988.10   |
| <i>C1GALTI</i>    | F: CTTTGTCTGGAGCCGGTTGA<br>R: TTCAGCCAAGATTTAGAGGCCA    | 110                 | NM_022950.3    |
| <i>C1GALTI1</i>   | F: TACAACCTGGTTCTTCCTTGCAC<br>R: AGAAGGCCATTGAGTCTT     | 194                 | XM_006257487.2 |
| <i>ST3GAL1</i>    | F: GACAGTCCACAACGCTCTGA<br>R: CAACCCACCAACCTCTTGTT      | 159                 | NM_001013219.2 |
| <i>ST3GAL2</i>    | F: ATGGCTACCTTGCCCTACCT<br>R: GTCCAGACGGGTGAGATGTT      | 203                 | XM_039097961.1 |
| <i>ST3GAL3</i>    | F: AGGCTGCCTTCACTCTCATT<br>R: CATTGGGTGTGTTTCATGTCA     | 156                 | XM_039110707.1 |
| <i>ST3GAL4</i>    | F: CTACACCTCTGCGACTTGGT<br>R: GGTTCTTGACAGCTCCCATC      | 181                 | NM_203337.3    |
| <i>ST3GAL6</i>    | F: ATGCCTGGTTGTGGAAGTC<br>R: GCCTGCATGGGCTACATAGT       | 192                 | XM_039088387.1 |
| <i>ST6GALNAC1</i> | F: AGCCTCGGTGGGATTTTGAG<br>R: TAGCCTGTACCACTCGCTCT      | 179                 | NM_001105859.1 |
| <i>ST6GALNAC2</i> | F: GTCCCAAATGCCAAAGCCAT<br>R: CCAGACATAACCACCTTGCACT    | 212                 | NM_001031652.2 |
| <i>ST6GALNAC4</i> | F: GCTAGCATGGTGAAAACCCC<br>R: TGTGACAACGTGTCCCATCC      | 245                 | NM_001399379.1 |
| <i>MUC2</i>       | F: TGCTGCTTCTGGTCTGACTG<br>R: TGCAAATGAGCCCCCTCTGAG     | 190                 | NM_022174.1    |
| <i>GAPDH</i>      | F: GGTGGACCTCATGGCCTACA<br>R: CTCTCTTGCTCTCAGTATCCTTGCT | 84                  | NM_017008.4    |
| <i>TNF-α</i>      | F: CCCAGACCCTCACACTCAGAT<br>R: TTGTCCCTTGAAGAGAACCTG    | 215                 | NM_012675.3    |

---

|                                 |                                                            |     |                |
|---------------------------------|------------------------------------------------------------|-----|----------------|
| <i>IL-1<math>\beta</math></i>   | F: TGCTGATGTACCAGTTGGGG<br>R: CTCCATGAGCTTTGTACAAG         | 145 | NM_031512.2    |
| <i>TLR4</i>                     | F: AGTTGGCTCTGCCAAGTCTCAGAT<br>R: TGGCACTCATCAGGATGACACCAT | 144 | NM_019178.2    |
| <i>MyD88</i>                    | F: AACTGAAGGACCGCATCGAG<br>R: AGCAGATGAAGGCGTCGAAA         | 189 | NM_198130.2    |
| <i>NF-<math>\kappa</math>B</i>  | F: GATCGCCACCGGATTGAAGA<br>R: CTCGGGAAGGCACAGCAATA         | 130 | XM_039079521.1 |
| NEU1                            | F: CGTAGACACTTTTCGAATCC<br>R: CTCCTCATAGCGATGAACTTG        | 120 | NM_031522.3    |
| NEU2                            | F: GAGCCACCAACCATGTCAAG<br>R: AAGGGACATGGATTCATGGAG        | 88  | XM_006245362.4 |
| NEU3                            | F: TGA CTGAGGAAGTCGTTGGC<br>R: GGGGCTTGACTGAACATGGA        | 159 | NM_001393673.1 |
| NEU4                            | F: CCGGACTGTGGTTGGTAGAC<br>R: ACCAGGGAGCGTAAAGCAAT         | 106 | NM_001108234.1 |
| <i><math>\beta</math>-actin</i> | F: TCAGGTCATCACTATCGGCAAT<br>R: AAAGAAAGGGTGTA AACGCA      | 232 | NM_031144.3    |

---
