# Supplementary material for: Galacto-oligosaccharides regulate intestinal mucosal sialylation to counteract antibiotic-induced mucin dysbiosis
Source: Royal Society of Chemistry journal article supplement (doi:10.1039/d4fo04626a), 2024-01-01
Supplement: d4fo04626a10.pdf [file d4fo04626a10.pdf]

**Supplementary Table S3 UPLC elution program applied to the separation  
of *O*-glycans**

| Time<br>(min) | Flow rate<br>(mL/min), | Concentration of<br>ammonium formate (%) | Concentration of<br>acetonitrile (%) |
|---------------|------------------------|------------------------------------------|--------------------------------------|
| 0.00          | 0.50                   | 5.00                                     | 95.00                                |
| 6.00          | 0.50                   | 22.00                                    | 78.00                                |
| 44.50         | 0.50                   | 44.10                                    | 55.90                                |
| 46.50         | 0.25                   | 100.00                                   | 0.00                                 |
| 48.50         | 0.25                   | 100.00                                   | 0.00                                 |
| 52.00         | 0.25                   | 5.00                                     | 95.00                                |
| 55.00         | 0.50                   | 5.00                                     | 95.00                                |
| 57.00         | 0.50                   | 5.00                                     | 95.00                                |
