# Supplementary figures and images for: Galacto-oligosaccharides regulate intestinal mucosal sialylation to counteract antibiotic-induced mucin dysbiosis
Source: Royal Society of Chemistry journal article supplement (doi:10.1039/d4fo04626a), 2024-01-01

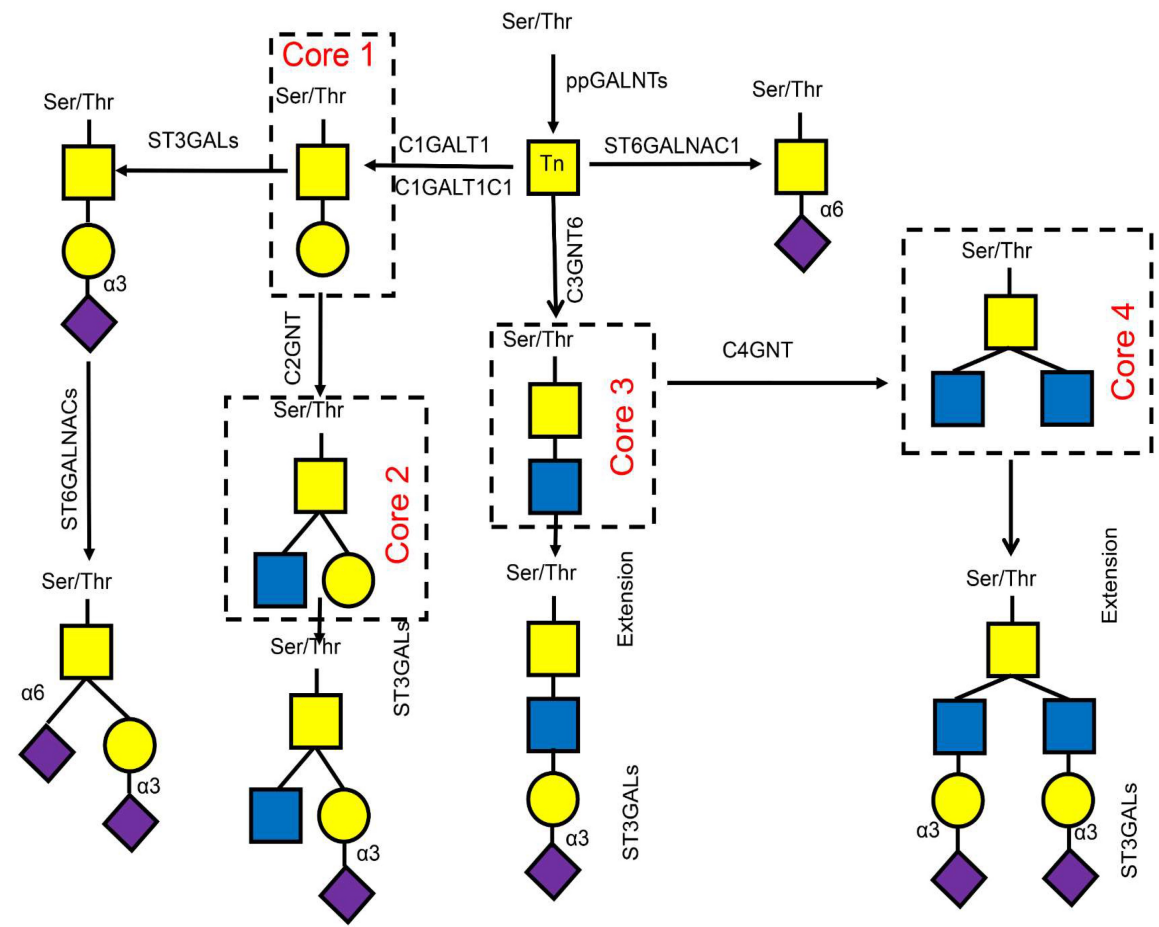

Supplement: d4fo04626a1.pdf [file d4fo04626a1.pdf]

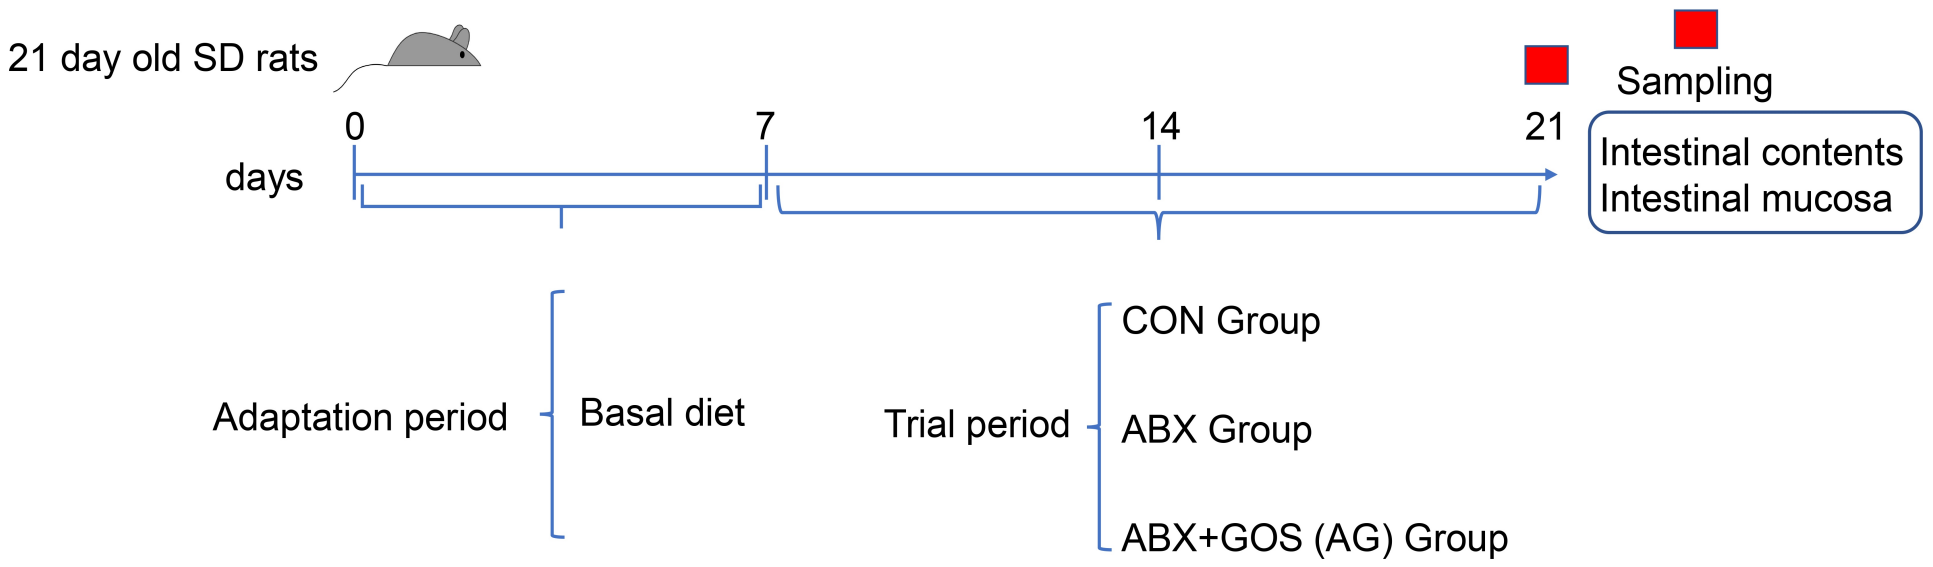

Supplement: d4fo04626a2.pdf [file d4fo04626a2.pdf]

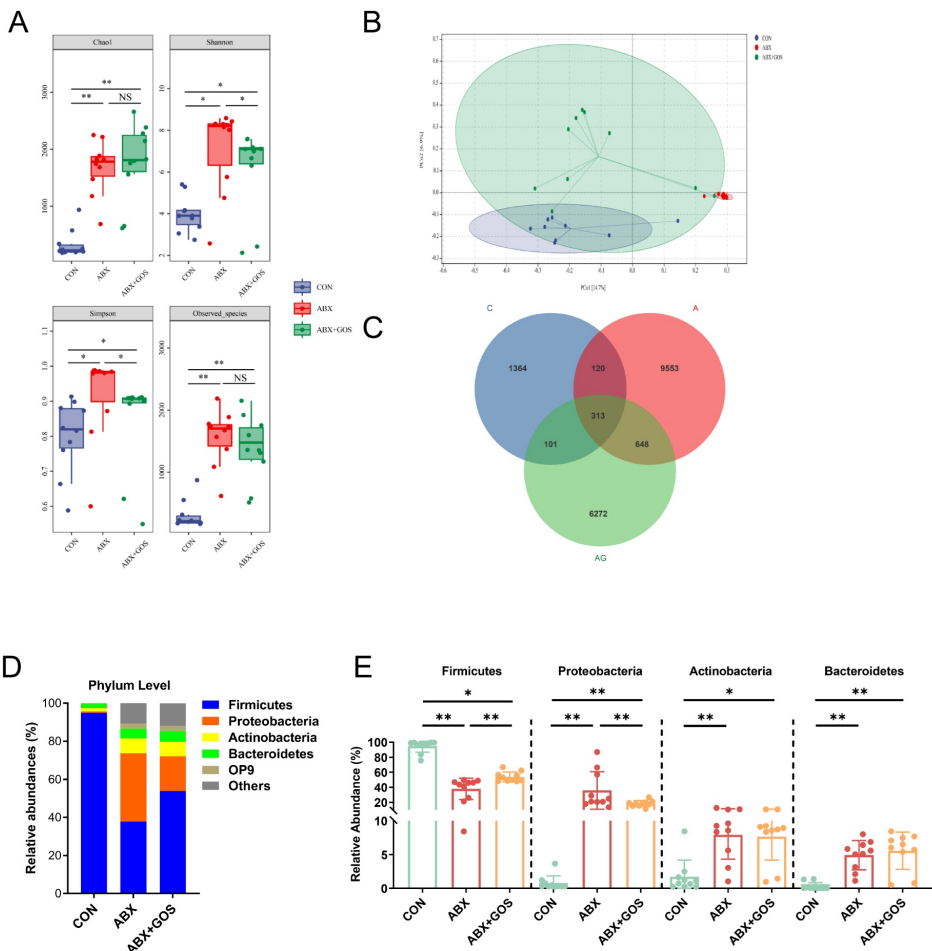

Supplement: d4fo04626a3.pdf [file d4fo04626a3.pdf]

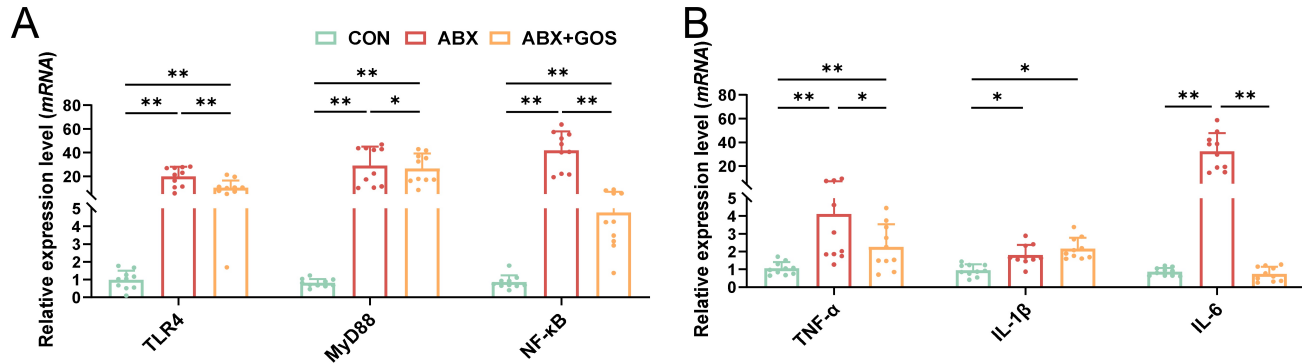

Supplement: d4fo04626a4.pdf [file d4fo04626a4.pdf]

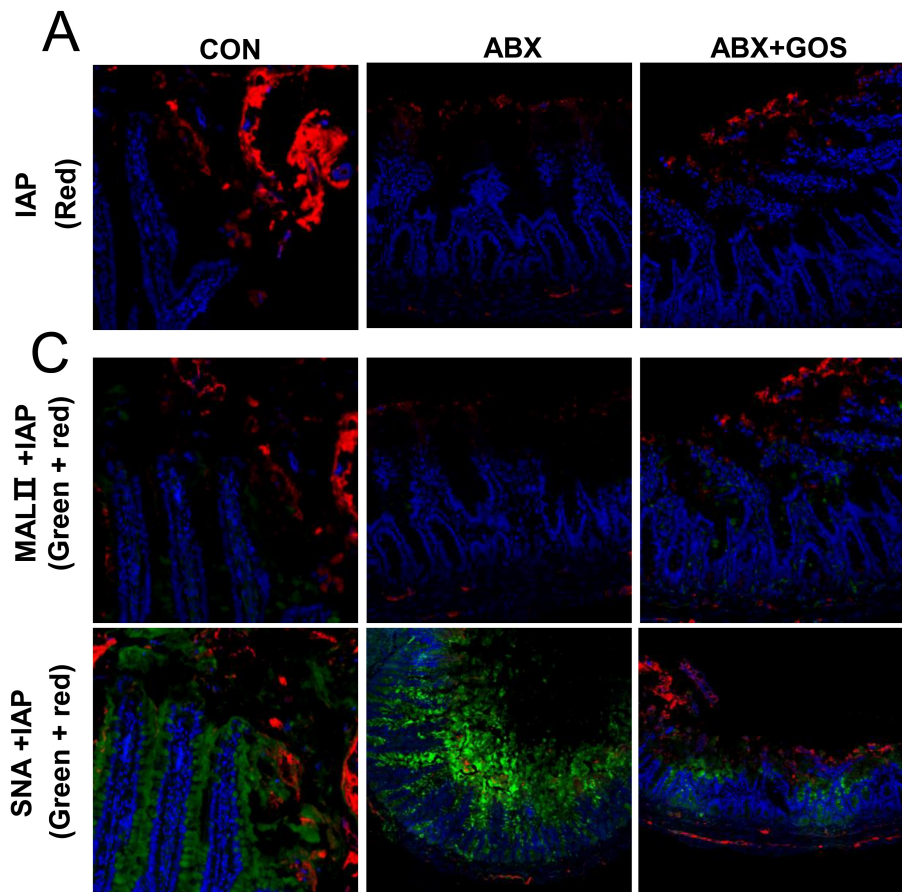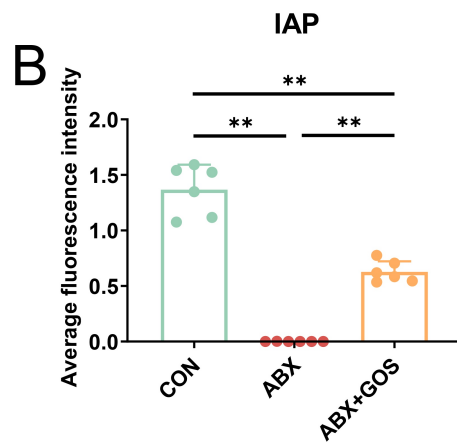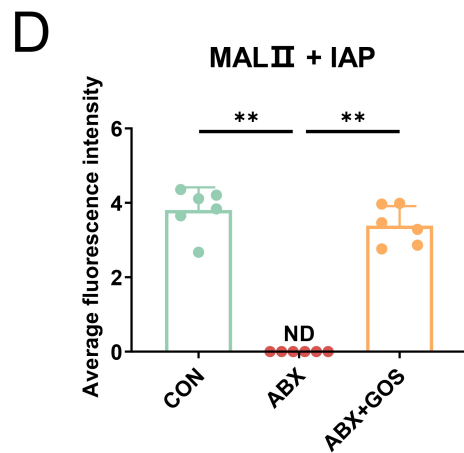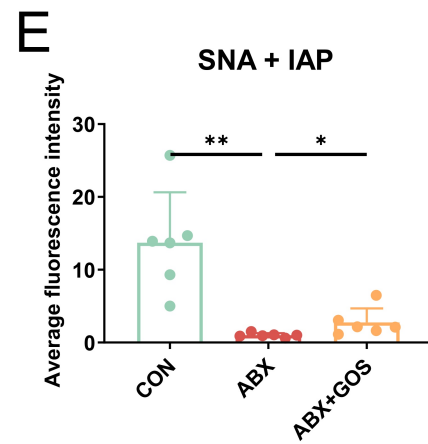

Supplement: d4fo04626a5.pdf [file d4fo04626a5.pdf]

A

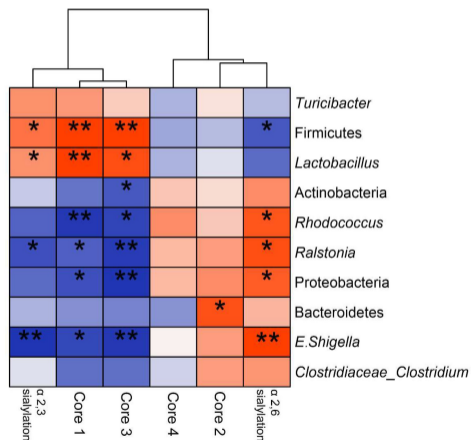

B

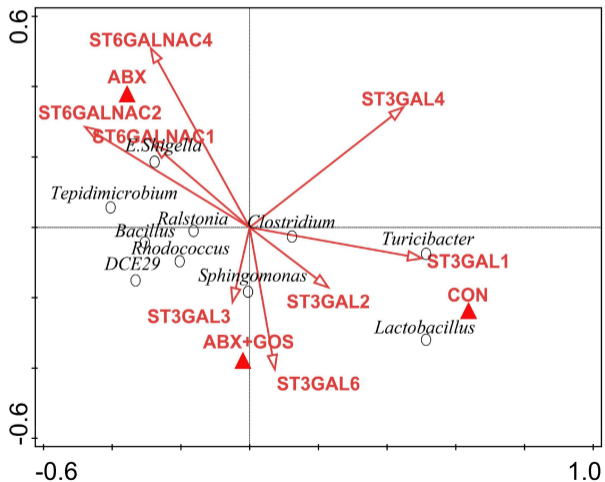

Supplement: d4fo04626a6.pdf [file d4fo04626a6.pdf]
